# Supplementary material
Source: Springer Nature journal article supplement (https://www.springermedizin.de/resource/supplementary/12887_2009_283_MOESM1_ESM.pdf/9477696)

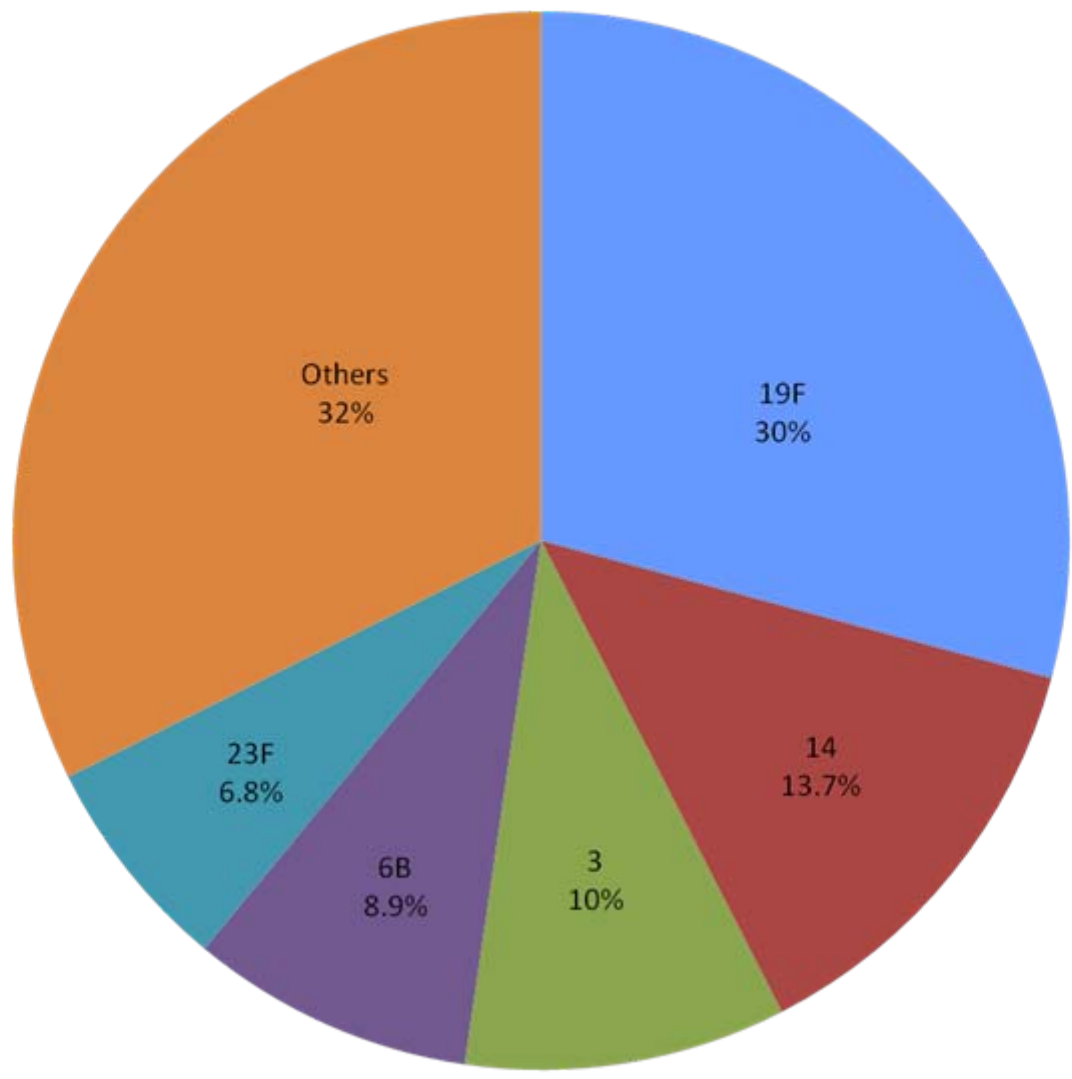

Supplement: MOESM1 [file 9477696]
